# Supplementary material
Source: ML conference proceedings conference paper supplement (https://proceedings.neurips.cc/paper_files/paper/2021/hash/4f00921114932db3f8662a41b44ee68f-Abstract.html)
Supplement: Supplementary file [file 4f00921114932db3f8662a41b44ee68f-Supplemental.pdf]

---

# Supplementary Material for: An Exponential Lower Bound for Linearly-Realizable MDPs with Constant Suboptimality Gap

---

## 1 Proof of Lemma 2

*Proof.* We first verify the statement for the terminal state  $f$ . Observe that at the terminal state  $f$ , regardless of the action taken, the next state is always  $f$  and the reward is always 0. Hence  $Q_h^*(f, \cdot) = V_h^*(f) = 0$  for all  $h \in [H]$ . Thus  $Q_h^*(f, \cdot) = \langle \phi(f, \cdot), v(a^*) \rangle = 0$ .

We now verify realizability for other states via induction on  $h = H, H - 1, \dots, 1$ . The induction hypothesis is  $\forall a_1 \in [m], a_2 \neq a_1$ ,

$$Q_h^*(\bar{a}_1, a_2) = \left( \langle v(a_1), v(a_2) \rangle + 2\gamma \right) \cdot \langle v(a_2), v(a^*) \rangle, \quad (1)$$

and that  $\forall a_1 \neq a^*$ ,

$$V_h^*(\bar{a}_1) = Q_h^*(\bar{a}_1, a^*) = \langle v(a_1), v(a^*) \rangle + 2\gamma. \quad (2)$$

When  $h = H$ , (1) holds by the definition of rewards. Next, note that  $\forall h$ , (2) follows from (1). This is because for  $a_2 \neq a^*, a_1$ ,

$$Q_h^*(\bar{a}_1, a_2) = \left( \langle v(a_1), v(a_2) \rangle + 2\gamma \right) \cdot \langle v(a_2), v(a^*) \rangle \leq 3\gamma^2,$$

while

$$Q_h^*(\bar{a}_1, a^*) = \langle v(a_1), v(a^*) \rangle + 2\gamma \geq \gamma > 3\gamma^2.$$

In other words, (1) implies that  $a^*$  is always the optimal action. Thus, it remains to show that (1) holds for  $h$  assuming (2) holds for  $h + 1$ . By Bellman's optimality equation,

$$\begin{aligned} Q_h^*(\bar{a}_1, a_2) &= R_h(\bar{a}_1, a_2) + \mathbb{E}_{s_{h+1}} [V_{h+1}^*(s_{h+1}) | \bar{a}_1, a_2] \\ &= -2\gamma \left[ \langle v(a_1), v(a_2) \rangle + 2\gamma \right] + \Pr[s_{h+1} = \bar{a}_2] \cdot V_{h+1}^*(a_2) + \Pr[s_{h+1} = f] \cdot V_{h+1}^*(f) \\ &= -2\gamma \left[ \langle v(a_1), v(a_2) \rangle + 2\gamma \right] + \left[ \langle v(a_1), v(a_2) \rangle + 2\gamma \right] \cdot \left( \langle v(a_1), v(a^*) \rangle + 2\gamma \right) \\ &= \left( \langle v(a_1), v(a_2) \rangle + 2\gamma \right) \cdot \langle v(a_1), v(a^*) \rangle. \end{aligned}$$

This is exactly (1) for  $h$ . Hence both (1) and (2) hold for all  $h \in [H]$ . □

## 2 Proof of Lemma 5

*Proof.* We state a proof of this lemma for completeness. By Lemma 4,  $\forall s$ ,

$$\max_{a \in \mathcal{A}} \phi(s, a)^\top \Sigma_s^{-1} \phi(s, a) \leq d.$$

It follows that  $\forall a \in \mathcal{A}$ ,

$$\phi(s, a) \phi(s, a)^\top \preceq d \Sigma_s.$$

Therefore,

$$\begin{aligned}\mathbb{E}_{s \sim \nu} \left[ \max_{a \in \mathcal{A}} \phi(s, a)^\top \Sigma^{-1} \phi(s, a) \right] &= \mathbb{E}_{s \sim \nu} \max_{a \in \mathcal{A}} \text{Tr} \left( \phi(s, a) \phi(s, a)^\top \Sigma^{-1} \right) \\ &\leq \mathbb{E}_{s \sim \nu} \text{Tr} \left( d \Sigma_s \Sigma^{-1} \right) = d^2.\end{aligned}$$

□

### 3 Addressing Footnote 3

Let us redefine  $\mathcal{M}_{a^*}$  as follows. The state space is again  $\{\bar{1}, \dots, \bar{m}, f\}$ . The action space is  $[m]$  for every state. We will also use the same set of  $m$   $d$ -dimensional vectors  $\{v_1, \dots, v_m\}$ . In this construction, we will reset  $\gamma := \frac{1}{6}$ .

**Features.** The feature map now maps state-action pairs to  $d + 1$  dimensional vectors, and is defined as follows.

$$\begin{aligned}\phi(\bar{a}_1, a_2) &:= \left( 0, \left( \langle v(a_1), v(a_2) \rangle + 2\gamma \right) \cdot v(a_2) \right), & (\forall a_1, a_2 \in [m], a_1 \neq a_2) \\ \phi(\bar{a}_1, a_1) &:= \left( \frac{3}{4}\gamma, 0 \right), & (\forall a_1 \in [m]) \\ \phi(f, 1) &= (0, \mathbf{0}), \\ \phi(f, a) &:= (-1, \mathbf{0}). & (\forall a \neq 1)\end{aligned}$$

Note that the feature map is again independent of  $a^*$ . Define  $\theta^* := (1, v(a^*))$ .

**Rewards.** For  $1 \leq h < H$ , the rewards are defined as

$$\begin{aligned}R_h(\bar{a}_1, a^*) &:= \langle v(a_1), v(a^*) \rangle + 2\gamma, & (a_1 \neq a^*) \\ R_h(\bar{a}_1, a_2) &:= -2\gamma \left[ \langle v(a_1), v(a_2) \rangle + 2\gamma \right], & (a_2 \neq a^*, a_2 \neq a_1) \\ R_h(\bar{a}_1, a_1) &:= \frac{3}{4}\gamma, & (\forall a_1) \\ R_h(f, 1) &:= 0, \\ R_h(f, a) &:= -1. & (a \neq 1)\end{aligned}$$

For  $h = H$ ,  $r_H(s, a) := \langle \phi(s, a), v(a^*) \rangle$  for every state-action pair.

**Transitions.** The initial state distribution is set as a uniform distribution over  $\{\bar{1}, \dots, \bar{m}\}$ . The transition probabilities are set as follows.

$$\begin{aligned}\Pr[f | \bar{a}_1, a^*] &= 1, \\ \Pr[f | \bar{a}_1, a_1] &= 1, \\ \Pr[\cdot | \bar{a}_1, a_2] &= \begin{cases} \bar{a}_2 : \langle v(a_1), v(a_2) \rangle + 2\gamma \\ f : 1 - \langle v(a_1), v(a_2) \rangle - 2\gamma \end{cases}, & (a_2 \neq a^*, a_2 \neq a_1) \\ \Pr[f | f, \cdot] &= 1.\end{aligned}$$

We now check realizability in the new MDP. Note that now we want to show  $Q_h^*(s, a) = \phi(s, a)^\top \theta^*$ , where  $\theta^* = (1, v(a^*))$ . We claim that  $\forall h \in [H]$ ,

$$\begin{aligned}V_h^*(\bar{a}_1) &= \langle v(a_1), v(a^*) \rangle + 2\gamma, & (a_1 \neq a^*) \\ Q_h^*(\bar{a}_1, a_2) &= (\langle v(a_1), v(a_2) \rangle + 2\gamma) \cdot \langle v(a_2), v(a^*) \rangle, & (a_2 \neq a_1) \\ Q_h^*(\bar{a}_1, a_1) &= \frac{3}{4}\gamma. & (\forall a_1)\end{aligned}$$

To see this, first notice that the expression of  $Q_h^*$  implies that the optimal action is  $a^*$  for any non-terminal state. Suppose  $a_1 \neq a^*$ , then for  $a_2 \neq a_1, a^*$ ,  $Q_h^*(\bar{a}_1, a_2) \leq 3\gamma^2 < \gamma \leq Q_h^*(\bar{a}_1, a^*)$ . Moreover,

$$Q_h^*(\bar{a}_1, a_1) = \frac{3}{4}\gamma < \gamma \leq Q_h^*(\bar{a}_1, a^*).$$

Thus,  $a^*$  is indeed the optimal action for  $\bar{a}_1$  if  $a_1 \neq a^*$ .

For  $\bar{a}^*$ ,  $a_1 \neq a^*$ ,  $Q_h^*(\bar{a}^*, a_1) \leq 3\gamma^2 < \frac{3}{4}\gamma = Q_h^*(\bar{a}^*, a^*)$ . Therefore,  $a^*$  is the optimal action for all states (besides  $f$ ).

As for  $f$ , it is easy to see that  $Q_h^*(f, 1) = 0$ , and that  $\forall a \neq 1$ ,  $Q_h^*(f, a) = -1$ .

What remains is show the statements for all  $h$  via induction. Suppose that

$$Q_{h+1}^*(\bar{a}_1, a_2) = (\langle v(a_1), v(a_2) \rangle + 2\gamma) \cdot \langle v(a_2), v(a^*) \rangle. \quad (a_2 \neq a_1)$$

Then indeed  $V_{h+1}^*(\bar{a}_1) = Q_{h+1}^*(\bar{a}_1, a^*) = \langle v(a_1), v(a^*) \rangle + 2\gamma$ . It follows that  $\forall a_2 \neq a^*$

$$\begin{aligned} Q_h^*(\bar{a}_1, a_2) &= R_h(\bar{a}_1, a_2) + \mathbb{E}_{s_{h+1}} [V_{h+1}^*(s_{h+1}) | \bar{a}_1, a_2] \\ &= -2\gamma \left[ \langle v(a_1), v(a_2) \rangle + 2\gamma \right] + \Pr[s_{h+1} = \bar{a}_2] \cdot V_{h+1}^*(a_2) + \Pr[s_{h+1} = f] \cdot V_{h+1}^*(f) \\ &= -2\gamma \left[ \langle v(a_1), v(a_2) \rangle + 2\gamma \right] + \left[ \langle v(a_1), v(a_2) \rangle + 2\gamma \right] \cdot \left( \langle v(a_1), v(a^*) \rangle + 2\gamma \right) \\ &= \left( \langle v(a_1), v(a_2) \rangle + 2\gamma \right) \cdot \langle v(a_1), v(a^*) \rangle. \end{aligned}$$

**Suboptimality Gap.** In  $\mathcal{M}_{a^*}$ ,  $\forall a_1 \neq a^*$ ,  $\forall a_2 \neq a^*$ ,  $Q_h^*(\bar{a}_1, a_2) \leq \max\{3\gamma^2, \frac{3}{4}\gamma\}$ . Thus

$$\Delta_h(\bar{a}_1, a_2) \geq \gamma - \max\{3\gamma^2, \frac{3}{4}\gamma\} = \frac{1}{24}.$$

For  $\bar{a}^*$ ,  $V_h^*(\bar{a}^*) = 1 - \gamma$ , while for  $a_1 \neq a^*$ ,

$$Q_h^*(\bar{a}^*, a_1) = (\langle v(a^*), v(a_1) \rangle + 2\gamma) \cdot \langle v(a^*), v(a_1) \rangle \leq 3\gamma^2.$$

Thus  $\Delta_h^*(\bar{a}^*, a_1) \geq \frac{3}{4}\gamma - 3\gamma^2 = \frac{1}{24}$ . As for the terminal state  $f$ , the suboptimality gap is obviously 1. Therefore  $\Delta_{\min} \geq \frac{1}{24}$  in this new MDP.

**Information theoretic arguments.** The modifications here do not affect the proof of Theorem 1. Suppose action  $a_2$  is taken at state  $\bar{a}_1$ . If  $a_1 \neq a_2$ , then the behavior (transitions and rewards) would be identical to the original MDP. If  $a_1 = a_2 \neq a^*$ , neither the transition and the rewards depend on  $a^*$ . Hence, we can still construct a reference MDP as in the proof of Theorem 1, such that information on  $a^*$  can only be gained by: (1) either taking  $a^*$ ; (2) or reaching  $s_H \neq f$ .

## 4 Proof of Theorem 1

**Theorem 1.** Consider an arbitrary online RL algorithm that takes the feature mapping  $\phi : \mathcal{S} \times \mathcal{A} \rightarrow \mathbb{R}^d$  as input. In the online RL setting, there exists an MDP with a feature mapping  $\phi$  satisfying Assumption 1 and Assumption 2 with  $\Delta_{\min} = \Omega(1)$ , such that the algorithm requires  $\min\{2^{\Omega(d)}, 2^{\Omega(H)}\}$  samples to find a policy  $\pi$  with

$$\mathbb{E}_{s_1 \sim \mu} V^\pi(s_1) \geq \mathbb{E}_{s_1 \sim \mu} V^*(s_1) - 0.05$$

with probability 0.1.

*Proof.* We consider  $K$  episodes of interaction between the algorithm and the MDP  $\mathcal{M}_a$ . Since each trajectory is a sequence of  $H$  states, we define the total number of samples as  $KH$ . Denote the state, the action and the reward at episode  $k$  and timestep  $h$  by  $s_h^k$ ,  $a_h^k$  and  $r_h^k$  respectively.

Consider the following reference MDP denoted by  $\mathcal{M}_0$ . The state space, action space, and features of this MDP are the same as those of the MDP family. The transitions are defined as follows:

$$\Pr[\cdot | \bar{a}_1, a_2] = \begin{cases} \bar{a}_2 : \langle v(a_1), v(a_2) \rangle + 2\gamma \\ f : 1 - \langle v(a_1), v(a_2) \rangle - 2\gamma \end{cases}, \quad (\forall a_1, a_2 \text{ s.t. } a_1 \neq a_2)$$

$$\Pr[f | f, \cdot] = 1.$$

The rewards are defined as follows:

$$R_h(\bar{a}_1, a_2) := -2\gamma \left[ \langle v(a_1), v(a_2) \rangle + 2\gamma \right], \quad (\forall a_1, a_2 \text{ s.t. } a_1 \neq a_2)$$

$$R_h(f, \cdot) := 0.$$

Intuitively, this MDP is very similar to the MDP family, except that the optimal action  $a^*$  is removed. More specifically,  $\mathcal{M}_0$  is identical to  $\mathcal{M}_a$  except when the action  $a$  is taken at a non-terminal state, or when an episode ends at a non-terminal state.

More specifically, we claim that for  $t < H, \forall s_t, a_t$  such that  $a_t \neq a$ ,

$$\Pr_{\mathcal{M}_a}[s_{t+1}|s_t, a_t] = \Pr_{\mathcal{M}_0}[s_{t+1}|s_t, a_t],$$

and that for  $t < H, \forall s_t, a_t$  such that  $a_t \neq a$ ,

$$r_t^{\mathcal{M}_a}(s_t, a_t) = r_t^{\mathcal{M}_0}(s_t, a_t).$$

Also,  $r_H^{\mathcal{M}_a}(s_t, a_t) = r_H^{\mathcal{M}_0}(s_t, a_t)$  if  $s_t = f$ . It follows that

$$\Pr_{\mathcal{M}_a} \left[ s_1^1, a_1^1, r_1^1, \dots, s_h^k, a_h^k, r_h^k \mid a \notin A_h^k, \forall k' \leq k, s_H^{k'} = f \right]$$

$$= \Pr_{\mathcal{M}_0} \left[ s_1^1, a_1^1, r_1^1, \dots, s_h^k, a_h^k, r_h^k \mid a \notin A_h^k, \forall k' \leq k, s_H^{k'} = f \right].$$

Here  $A_h^k$  is a shorthand for  $\{a_1^1, a_2^1, \dots, a_1^h, \dots, a_h^k\}$ , i.e. all actions taken up to timestep  $h$  for episode  $k$ . By marginalizing the states and the actions, we get

$$\Pr_{\mathcal{M}_a} \left[ a_h^k \mid a \notin A_h^k, \forall k' \leq k, s_H^{k'} = f \right] = \Pr_{\mathcal{M}_0} \left[ a_h^k \mid a \notin A_h^k, \forall k' \leq k, s_H^{k'} = f \right].$$

It then follows that

$$\Pr_{\mathcal{M}_a} \left[ a_h^k = a \mid a \notin A_h^k, \forall k' \leq k, s_H^{k'} = f \right] = \Pr_{\mathcal{M}_0} \left[ a_h^k = a \mid a \notin A_h^k, \forall k' \leq k, s_H^{k'} = f \right].$$

Next, we prove via induction that

$$\Pr_{\mathcal{M}_a} \left[ a \in A_h^k \mid \forall k' \leq k, s_H^{k'} = f \right] = \Pr_{\mathcal{M}_0} \left[ a \in A_h^k \mid \forall k' \leq k, s_H^{k'} = f \right]. \quad (3)$$

Suppose that (3) holds up to  $(k, h-1)$ . Then

$$\Pr_{\mathcal{M}_a} \left[ a \in A_h^k \mid \forall k' \leq k, s_H^{k'} = f \right]$$

$$= \Pr_{\mathcal{M}_a} \left[ a \notin A_{h-1}^k \right] \Pr_{\mathcal{M}_a} \left[ a_h^k = a \mid a \notin A_{h-1}^k, \forall k' \leq k, s_H^{k'} = f \right] + \Pr_{\mathcal{M}_a} \left[ a \in A_{h-1}^k \mid \forall k' \leq k, s_H^{k'} = f \right]$$

$$= \Pr_{\mathcal{M}_0} \left[ a \notin A_{h-1}^k \right] \Pr_{\mathcal{M}_0} \left[ a_h^k = a \mid a \notin A_{h-1}^k, \forall k' \leq k, s_H^{k'} = f \right] + \Pr_{\mathcal{M}_0} \left[ a \in A_{h-1}^k \mid \forall k' \leq k, s_H^{k'} = f \right]$$

$$= \Pr_{\mathcal{M}_0} \left[ a \in A_h^k \mid \forall k' \leq k, s_H^{k'} = f \right].$$

That is, (3) holds for  $h, k$  as well. By induction, (3) holds for all  $h, k$ . Thus,

$$\Pr_{\mathcal{M}_a} \left[ a \in A_h^k \right] \leq \Pr_{\mathcal{M}_a} \left[ a \in A_h^k \mid \forall k' \leq k, s_H^{k'} = f \right] + \Pr \left[ \exists k' \leq k, s_H^{k'} \neq f \right]$$

$$\leq \Pr_{\mathcal{M}_0} \left[ a \in A_h^k \mid \forall k' \leq k, s_H^{k'} = f \right] + k \cdot \left( \frac{3}{4} \right)^H.$$

Since  $|A_h^k| \leq kH, \sum_{a \in [m]} \Pr_{\mathcal{M}_0} \left[ a \in A_h^k \mid \forall k' \leq k, s_H^{k'} = f \right] \leq kH$ . It follows that there exists  $a^* \in [m]$  such that

$$\Pr_{\mathcal{M}_0} \left[ a^* \in A_H^K \mid \forall k' \leq K, s_H^{k'} = f \right] \leq \frac{KH}{m} = KH \cdot e^{-\Theta(d)}.$$

As a result

$$\Pr_{\mathcal{M}_{a^*}} \left[ a^* \in A_H^K \right] \leq KH \cdot e^{-\Theta(d)} + K \left( \frac{3}{4} \right)^H.$$

In other words, unless  $KH = 2^{\Omega(\min\{d, H\})}$ , the probability of taking the optimal action  $a^*$  in the interaction with  $\mathcal{M}_{a^*}$  is  $o(1)$ .

From the suboptimality gap condition, it follows that if  $\mathbb{E}_{s_1 \sim \mu} V^\pi(s_1) \geq \mathbb{E}_{s_1 \sim \mu} V^*(s_1) - 0.05$ ,  $\Pr[a_1 \neq a^* \wedge s_1 \neq \bar{a}^*] \cdot \Delta_{\min} \leq 0.05$ . Hence

$$\Pr[a_1 = a^*] \geq 1 - \left(0.8 + \frac{1}{m}\right) = 0.2 - \frac{1}{m}.$$

Therefore, if the algorithm is able to output such a policy with probability 0.1, it is able to take the action  $a^*$  in the next episode with  $\Theta(1)$  probability by executing  $\pi$ . However, as proved above, this is impossible unless  $KH = 2^{\Omega(\min\{d, H\})}$ .  $\square$

## 5 Proof of Theorem 2

Recall the statements of Assumptions 3 and 4.

**Assumption 3** (Low variance condition). There exists a constant  $1 \leq C_{\text{var}} < \infty$  such that for any  $h \in [H]$  and any policy  $\pi$ ,

$$\mathbb{E}_{s \sim \mathcal{D}_h^\pi} [|V^\pi(s) - V^*(s)|^2] \leq C_{\text{var}} \cdot (\mathbb{E}_{s \sim \mathcal{D}_h^\pi} [|V^\pi(s) - V^*(s)|])^2.$$

**Assumption 4.** There exists a constant  $1 \leq C_{\text{hyper}} < \infty$  such that for any  $h \in [H]$  and any policy  $\pi$ , the distribution of  $\phi(s, a)$  with  $(s, a) \sim \mathcal{D}_h^\pi$  is  $(C_{\text{hyper}}, 4)$ -hypercontractive. In other words,  $\forall \pi, \forall h \in [H], \forall v \in \mathbb{R}^d$ ,

$$\mathbb{E}_{(s, a) \sim \mathcal{D}_h^\pi} [(\phi(s, a)^\top v)^4] \leq C_{\text{hyper}} \cdot \left(\mathbb{E}_{(s, a) \sim \mathcal{D}_h^\pi} [(\phi(s, a)^\top v)^2]\right)^2.$$

**Theorem 2.** Assume that Assumption 1, 2, and one of Assumption 3 and 4 hold. Also assume that

$$\begin{aligned} \epsilon &\leq \text{poly}(\Delta_{\min}, 1/C_{\text{var}}, 1/d, 1/H) && \text{(Under Assumption 3)} \\ \text{or } \epsilon &\leq \text{poly}(\Delta_{\min}, 1/C_{\text{hyper}}, 1/d, 1/H). && \text{(Under Assumption 4)} \end{aligned}$$

Let  $\mu$  be the initial state distribution. Then with probability  $1 - \epsilon$ , running Algorithm 1 on input 0 returns a policy  $\pi$  which satisfies  $\mathbb{E}_{s_1 \sim \mu} V^\pi(s_1) \geq \mathbb{E}_{s_1 \sim \mu} V^*(s_1) - \epsilon$  using  $\text{poly}(1/\epsilon)$  trajectories.

*Proof under Assumption 3.* Let us set  $\beta = 8$ ,  $\lambda_{\text{ridge}} = \epsilon^2$ ,  $\lambda_r = \epsilon^6$ ,  $B = 2d \log(\frac{d}{\lambda_r})$ ,  $\epsilon_1 = \epsilon^2$ ,  $\epsilon_2 = \frac{\lambda_r}{2B}$ ,  $N = \frac{d \log(1/\epsilon_2)}{\epsilon_2^2}$ . Recall that  $\epsilon \leq \text{poly}(\Delta_{\min}, 1/C_{\text{var}}, 1/d, 1/H)$ . First, by Lemma 8, the event  $\Omega$  holds with probability  $1 - \epsilon$ ; we will condition on this event in the following proof. By lemma 10, when the algorithm terminates,  $|\Pi_h| \leq B$  for all  $h \in [H]$ . Note that this implies that Algorithm 1 is called or restarted at most  $H \cdot (1 + B)$  times. In each call or restart of Algorithm 1, at most  $NB + N$  trajectories are sampled. Therefore, when the algorithm terminates, at most

$$H(1 + B) \cdot (NB + N) \leq \text{poly}(1/\epsilon)$$

trajectories are sampled.

It remains to show that the greedy policy with respect to  $\theta_1, \dots, \theta_H$  is indeed  $\epsilon$ -optimal with high probability. To that end, let us state the following claims about the algorithm.

1. Each time Line 9 is reached in Algorithm 1,  $\forall \pi \in \Pi_h$ , define  $\tilde{\pi}_h$  as in (6),  $\forall h' > h$ ,

$$\mathbb{E}_{s_{h'} \sim \mathcal{D}_{h'}^{\tilde{\pi}_h}} \left[ \sup_{a \in \mathcal{A}} |\phi(s_{h'}, a)^\top (\theta_{h'} - \theta_{h'}^*)|^2 \right] \leq \frac{\Delta_{\min}^2 \epsilon}{4H}. \quad (4)$$

2. Each time when  $\theta_h$  is updated at Line 17,  $\forall \pi \in \Pi_h$ , define the associated covariance matrix at step  $h$  as  $\Sigma_h^\pi = \mathbb{E}_{s_h \sim \mathcal{D}_h^\pi, a_h \sim \rho_{s_h}} [\phi(s_h, a_h) \phi(s_h, a_h)^\top]$ . Then  $\|\theta_h - \theta_h^*\|_{\Sigma_h^\pi}^2 \leq 6BC_{\text{var}} \epsilon^2$ . It follows that

$$\mathbb{E}_{s_h \sim \mathcal{D}_h^\pi} \left[ \sup_{a \in \mathcal{A}} |\phi(s_h, a)^\top (\theta_h - \theta_h^*)|^2 \right] \leq \frac{\Delta_{\min}^2 \epsilon}{4H}. \quad (5)$$

Note that by the first claim with  $h = 0$ , it follows that for the greedy policy  $\hat{\pi}$  ( $\tilde{\pi}_0$  is always the greedy policy) w.r.t.  $\{\theta_h\}_{h \in [H]}$ ,  $\forall h \in [H]$ ,

$$\mathbb{E}_{s_h \sim \mathcal{D}_h^{\hat{\pi}}} \left[ \sup_{a \in \mathcal{A}} |\phi(s_h, a)^\top (\theta_h - \theta_h^*)|^2 \right] \leq \frac{\Delta_{\min}^2 \epsilon}{4H}.$$

Consequently by Markov's inequality,

$$\Pr_{s_h \sim \mathcal{D}_h^{\hat{\pi}}} \left[ \exists a \in \mathcal{A} : |\phi(s_h, a)^\top (\theta_h - \theta_h^*)| > \frac{\Delta_{\min}}{2} \right] \leq \frac{\epsilon}{H}.$$

By Assumption 2 and the fact that  $\hat{\pi}$  takes the greedy action w.r.t.  $\theta_h$ , this implies that

$$\Pr_{s_h \sim \mathcal{D}_h^{\hat{\pi}}} [\hat{\pi}_h(s_h) \neq \pi_h^*(s_h)] \leq \frac{\epsilon}{H}.$$

Thus for a random trajectory induced by  $\hat{\pi}$ , with probability at least  $1 - \epsilon$ ,  $\hat{\pi}_h(s_h) = \pi_h^*(s_h)$  for all  $h = 1, \dots, H$ , which proves the theorem.

It remains to prove the two claims.

**Proof of (5).** We first prove the second claim based on the assumption that the first claim holds when Line 9 is reached in the same execution of LearnLevel. By the first claim and the same arguments above,  $\forall \pi \in \Pi_h$ , construct  $\tilde{\pi}_h$  as

$$\tilde{\pi}_h(s_{h'}) = \begin{cases} \pi(s_{h'}) & (\text{if } h' < h) \\ \text{Sample from } \rho_{s_h}(\cdot) & (\text{if } h' = h) , \\ \arg \max_a \phi_{h'}(s_{h'}, a)^\top \theta_{h'} & (\text{if } h' > h) \end{cases}, \quad (6)$$

then  $\Pr_{s_{h'} \sim \mathcal{D}_{h'}^{\tilde{\pi}_h}} [\tilde{\pi}_h(s_{h'}) \neq \pi^*(s_{h'})] \leq \epsilon/H$ . Thus,

$$\mathbb{E}_{s_{h+1} \sim \mathcal{D}_{h+1}^{\tilde{\pi}_h}} [V_{h+1}^{\tilde{\pi}_h}(s_{h+1})] \geq \mathbb{E}_{s_{h+1} \sim \mathcal{D}_{h+1}^{\pi_h^*}} [V_{h+1}^*(s_{h+1})] - \epsilon.$$

By Assumption 3, this suggests that

$$\mathbb{E}_{s_{h+1} \sim \mathcal{D}_{h+1}^{\tilde{\pi}_h}} \left[ \left( V_{h+1}^{\tilde{\pi}_h}(s_{h+1}) - V_{h+1}^*(s_{h+1}) \right)^2 \right] \leq C_{\text{var}} \epsilon^2.$$

When  $(s_h, a_h, y)$  is sampled,

$$\begin{aligned} \mathbb{E}[y | s_h, a_h] &= \mathbb{E} \left[ R(s_h, a_h) + V_{h+1}^{\tilde{\pi}_h}(s_{h+1}) | s_h, a_h \right] \\ &= Q^*(s_h, a_h) + \mathbb{E} \left[ V_{h+1}^{\tilde{\pi}_h}(s_{h+1}) - V_{h+1}^*(s_{h+1}) | s_h, a_h \right], \end{aligned}$$

where the expectation is over trajectories induced by  $\tilde{\pi}_h$ . In other words,  $y_i := \sum_{h' \geq h} r_{h'}^i$  can be written as  $\phi(s_h^i, a_h^i)^\top \theta_h^* + b_i + \xi_i$ , where  $\xi_i$  is mean-zero independent noise with  $|\xi_i| \leq 2$  almost surely and  $b_i := \sum_{h' > h} r_{h'}^i - V_{h+1}^*(s_{h+1}^i)$  satisfies  $\mathbb{E}[b_i^2] \leq C_{\text{var}} \epsilon^2$ . Note that  $\theta_h$  is the ridge regression estimator for this linear model. By Lemma 7,

$$\mathbb{E}_{\pi \sim \text{Unif}(\Pi_h), s_h \sim \mathcal{D}_h^\pi, a_h \sim \rho_{s_h}} \left[ |\phi(s_h, a_h)^\top (\theta_h - \theta_h^*)|^2 \right] \leq 4(C_{\text{var}} \epsilon^2 + \epsilon_1 + \lambda_{\text{ridge}}) \leq 6C_{\text{var}} \epsilon^2.$$

It follows that  $\forall \pi \in \Pi_h$ ,

$$\mathbb{E}_{s_h \sim \mathcal{D}_h^\pi, a_h \sim \rho_{s_h}} \left[ |\phi(s_h, a_h)^\top (\theta_h - \theta_h^*)|^2 \right] \leq |\Pi_h| \cdot 6C_{\text{var}} \epsilon^2 \leq 6BC_{\text{var}} \epsilon^2.$$

Now, by Lemma 5,

$$\begin{aligned} &\mathbb{E}_{s_h \sim \mathcal{D}_h^\pi} \left[ \sup_{a \in \mathcal{A}} |\phi(s_h, a)^\top (\theta_h - \theta_h^*)|^2 \right] \\ &\leq \mathbb{E}_{s_h \sim \mathcal{D}_h^\pi} \left[ \sup_{a \in \mathcal{A}} \|\phi(s_h, a)\|_{(\Sigma_h^\pi)^{-1}}^2 \right] \cdot \|\phi_h - \phi_h^*\|_{\Sigma_h^\pi}^2 \\ &\leq d^2 \cdot 6BC_{\text{var}} \epsilon^2 \leq \frac{\Delta_{\min}^2 \epsilon}{4H}. \end{aligned}$$

This proves the second claim.

**Proof of (4).** Now, let us prove the first claim, assuming that the second claim holds for the last update of any  $\theta_h$ . By observing Algorithm 1, if Line 9 is reached, during the last execution of the first for loop (i.e. Lines 1 to 8), the if clause at Line 5 must have returned False every time (otherwise the algorithm will restart). It follows that during the last execution of Lines 1 to 8, neither  $\{\theta_h\}_{h \in [H]}$  nor  $\{\Pi_h\}_{h \in [H]}$  is updated.

Consider the if clause when checking  $\pi \in \Pi_h$  for layer  $h'$ . Recall that

$$\Sigma_{h'}^{\tilde{\pi}_h} = \mathbb{E}_{s_{h'} \sim \mathcal{D}_{h'}^{\tilde{\pi}_h}, a_{h'} \sim \rho_{s_{h'}}} [\phi(s_{h'}, a_{h'}) \phi(s_{h'}, a_{h'})^\top].$$

Also define  $\Sigma_{h'}^* := \frac{\lambda_r}{|\Pi_{h'}|} I + \mathbb{E}_{\pi \sim \text{Unif}(\Pi_{h'})} \Sigma_{h'}^\pi$ . Then by Lemma 9,

$$\|(\Sigma_{h'}^*)^{-\frac{1}{2}} \Sigma_{h'}^{\tilde{\pi}_h} (\Sigma_{h'}^*)^{-\frac{1}{2}}\|_2 \leq 3\beta |\Pi_{h'}|.$$

It follows that

$$\begin{aligned} \|\theta_{h'} - \theta_{h'}^*\|_{\Sigma_{h'}^{\tilde{\pi}_h}}^2 &= (\theta_{h'} - \theta_{h'}^*)^\top \Sigma_{h'}^{\tilde{\pi}_h} (\theta_{h'} - \theta_{h'}^*) \\ &= \left( (\Sigma_{h'}^*)^{\frac{1}{2}} (\theta_{h'} - \theta_{h'}^*) \right)^\top \left( (\Sigma_{h'}^*)^{-\frac{1}{2}} \Sigma_{h'}^{\tilde{\pi}_h} (\Sigma_{h'}^*)^{-\frac{1}{2}} \right) \left( (\Sigma_{h'}^*)^{\frac{1}{2}} (\theta_{h'} - \theta_{h'}^*) \right) \\ &\leq \|\theta_{h'} - \theta_{h'}^*\|_{\Sigma_{h'}^*}^2 \cdot \|(\Sigma_{h'}^*)^{-\frac{1}{2}} \Sigma_{h'}^{\tilde{\pi}_h} (\Sigma_{h'}^*)^{-\frac{1}{2}}\|_2 \\ &\leq 3\beta B \cdot \left( \lambda_r \cdot \left( \frac{2}{\lambda_{\text{ridge}}} \right)^2 + 6BC_{\text{var}}\epsilon^2 \right) \\ &\leq 24B^2 \cdot 10C_{\text{var}}\epsilon^2. \end{aligned}$$

By Lemma 5,

$$\mathbb{E}_{s_{h'} \sim \mathcal{D}_{h'}^{\tilde{\pi}_h}} \left[ \sup_{a \in \mathcal{A}} \|\phi(s_{h'}, a)\|_{(\Sigma_{h'}^{\tilde{\pi}_h})^{-1}}^2 \right] \leq d^2.$$

As a result,

$$\begin{aligned} \mathbb{E}_{s_{h'} \sim \mathcal{D}_{h'}^{\tilde{\pi}_h}} \left[ \sup_{a \in \mathcal{A}} |\phi(s_{h'}, a)^\top (\theta_{h'} - \theta_{h'}^*)|^2 \right] &\leq \mathbb{E}_{s_{h'} \sim \mathcal{D}_{h'}^{\tilde{\pi}_h}} \left[ \|\theta_{h'} - \theta_{h'}^*\|_{\Sigma_{h'}^{\tilde{\pi}_h}}^2 \cdot \sup_{a \in \mathcal{A}} \|\phi(s_{h'}, a)\|_{(\Sigma_{h'}^{\tilde{\pi}_h})^{-1}}^2 \right] \\ &\leq 240B^2 C_{\text{var}}\epsilon^2 \cdot d^2 \leq \frac{\epsilon \Delta_{\min}^2}{4H}. \end{aligned}$$

This proves the first claim. The failure probability of the algorithm is controlled by Lemma 8.  $\square$

*Proof under Assumption 4.* The proof under Assumption 4 is quite similar, except that we will use Lemma 14 instead of Lemma 7 for the analysis of ridge regression. The different analysis of ridge regression results in a slightly different choice of algorithmic parameters.

Let us set  $\beta = 8$ ,  $\epsilon_0 = \epsilon^2$ ,  $\lambda_{\text{ridge}} = \epsilon^3$ ,  $\lambda_r = \epsilon^9$ ,  $B = 2d \log(\frac{d}{\lambda_r})$ ,  $\epsilon_1 = \epsilon^3$ ,  $\epsilon_2 = \frac{\lambda_r}{2B}$ ,  $N = \frac{d}{\epsilon^2}$ . Recall that  $\epsilon \leq \text{poly}(\Delta_{\min}, 1/C_{\text{hyper}}, 1/d, 1/H)$ . We will state similar claims about the algorithm.

1. Each time Line 9 is reached in Algorithm 1,  $\forall \pi \in \Pi_h$ , define  $\tilde{\pi}_h$  as in (6),  $\forall h' > h$ ,

$$\mathbb{E}_{s_{h'} \sim \mathcal{D}_{h'}^{\tilde{\pi}_h}} \left[ \sup_{a \in \mathcal{A}} |\phi(s_{h'}, a)^\top (\theta_{h'} - \theta_{h'}^*)|^2 \right] \leq \frac{\Delta_{\min}^2 \epsilon_0}{4H}. \quad (7)$$

2. Each time when  $\theta_h$  is updated at Line 17,  $\forall \pi \in \Pi_h$ , define the associated covariance matrix at step  $h$  as  $\Sigma_h^\pi = \mathbb{E}_{s_h \sim \mathcal{D}_h^\pi, a_h \sim \rho_{s_h}} [\phi(s_h, a_h) \phi(s_h, a_h)^\top]$ . Then  $\|\theta_h - \theta_h^*\|_{\Sigma_h^\pi}^2 \leq \frac{\Delta_{\min}^2 \epsilon_0}{120HBd^2}$ . It follows that

$$\mathbb{E}_{s_h \sim \mathcal{D}_h^\pi} \left[ \sup_{a \in \mathcal{A}} |\phi(s_h, a)^\top (\theta_h - \theta_h^*)|^2 \right] \leq \frac{\Delta_{\min}^2 \epsilon_0}{4H}. \quad (8)$$

As in the proof under Assumption 3, these two claims are sufficient to guarantee that the greedy policy induced by  $\{\theta_h\}_{h \in [H]}$  is  $\epsilon$ -optimal. We now prove the two claims in similar fashion.

**Proof of (8).** We first prove the second claim based on the assumption that the first claim holds when Line 9 is reached in the same execution of LearnLevel. By the first claim,  $\forall \pi \in \Pi_h$ , construct  $\tilde{\pi}_h$  as in (6), then

$$\Pr_{s_{h'} \sim \mathcal{D}_{h'}^{\tilde{\pi}_h}} [\tilde{\pi}_h(s_{h'}) \neq \pi^*(s_{h'})] \leq \epsilon_0/H. \quad (9)$$

When  $(s_h, a_h, y)$  is sampled,

$$\begin{aligned} \mathbb{E}[y|s_h, a_h] &= \mathbb{E} \left[ R(s_h, a_h) + V_{h+1}^{\tilde{\pi}_h}(s_{h+1}) | s_h, a_h \right] \\ &= Q^*(s_h, a_h) + \mathbb{E} \left[ V_{h+1}^{\tilde{\pi}_h}(s_{h+1}) - V_{h+1}^*(s_{h+1}) | s_h, a_h \right], \end{aligned}$$

where the expectation is over trajectories induced by  $\tilde{\pi}_h$ . In other words,  $y_i := \sum_{h' \geq h} r_{h'}^i$  can be written as  $\phi(s_h^i, a_h^i)^\top \theta_h^* + b_i + \xi_i$ , where  $\xi_i$  is mean-zero independent noise with  $|\xi_i| \leq 2$  almost surely, and  $b_i$  is defined as

$$b_i := - \sum_{h' > h} (V^*(s_{h'}^i) - Q^*(s_{h'}^i, a_{h'}^i)).$$

Here  $\mathbb{E}[\xi_i] = 0$  because

$$\mathbb{E}[\xi_i] = \mathbb{E} \left[ \sum_{h' \geq h} r_{h'}^i \right] - Q_h^*(s_h^i, a_h^i) - \mathbb{E}[b_i] = Q^{\tilde{\pi}_h}(s_h^i, a_h^i) - Q^*(s_h^i, a_h^i) + (Q^*(s_h^i, a_h^i) - Q^{\tilde{\pi}_h}(s_h^i, a_h^i)) = 0.$$

By (9),  $\Pr[b_i \neq 0] \leq \epsilon_0$ . Thus by Lemma 14,

$$\begin{aligned} \mathbb{E}_{\pi \sim \text{Unif}(\Pi_h), s_h \sim \mathcal{D}_h^\pi, a_h \sim \rho_{s_h}} \left[ \left| \phi(s_h, a_h)^\top (\theta_h - \theta_h^*) \right|^2 \right] &\leq 8(\epsilon_1 + \lambda_{\text{ridge}}) + 288\epsilon_0^{1.5} C_{\text{hyper}}^{2.5} d^{4.5} \left( \frac{2B}{\epsilon} \right)^{0.5} \\ &\leq 16\epsilon^3 + 288\epsilon^{2.5} C_{\text{hyper}}^{2.5} d^{4.5} (2B)^{0.5}. \end{aligned}$$

It follows that  $\forall \pi \in \Pi_h$ ,

$$\mathbb{E}_{s_h \sim \mathcal{D}_h^\pi, a_h \sim \rho_{s_h}} \left[ \left| \phi(s_h, a_h)^\top (\theta_h - \theta_h^*) \right|^2 \right] \leq |\Pi_h| \cdot (16\epsilon^2 + 288\epsilon^{2.5} C_{\text{hyper}}^{2.5} d^{4.5} (2B)^{0.5}) \leq \frac{\Delta_{\min}^2 \epsilon_0}{120HBd^2},$$

where we used the fact  $\epsilon \leq \text{poly}(\Delta_{\min}, 1/C_{\text{hyper}}, 1/d, 1/H)$ . Now, by Lemma 5,

$$\begin{aligned} \mathbb{E}_{s_h \sim \mathcal{D}_h^\pi} \left[ \sup_{a \in \mathcal{A}} \left| \phi(s_h, a)^\top (\theta_h - \theta_h^*) \right|^2 \right] &\leq \mathbb{E}_{s_h \sim \mathcal{D}_h^\pi} \left[ \sup_{a \in \mathcal{A}} \|\phi(s_h, a)\|_{(\Sigma_h^\pi)^{-1}}^2 \right] \cdot \|\phi_h - \phi_h^*\|_{\Sigma_h^\pi}^2 \\ &\leq d^2 \cdot \frac{\Delta_{\min}^2 \epsilon_0}{120HBd^2} \leq \frac{\Delta_{\min}^2 \epsilon_0}{4H}. \end{aligned}$$

This proves the second claim.

**Proof of (7).** Now, let us prove the first claim, assuming that the second claim holds for the last update of any  $\theta_h$ . Consider Line 9 when checking for  $\pi \in \Pi_h$  for layer  $h'$ . Recall that

$$\Sigma_{h'}^{\tilde{\pi}_h} = \mathbb{E}_{s_{h'} \sim \mathcal{D}_{h'}^{\tilde{\pi}_h}, a_{h'} \sim \rho_{s_{h'}}} \left[ \phi(s_{h'}, a_{h'}) \phi(s_{h'}, a_{h'})^\top \right].$$

Similar to the proof under Assumption 3, we can bound  $\|\theta_{h'} - \theta_{h'}^*\|_{\Sigma_{h'}^{\tilde{\pi}_h}}$  by

$$\begin{aligned} \|\theta_{h'} - \theta_{h'}^*\|_{\Sigma_{h'}^{\tilde{\pi}_h}}^2 &\leq \|\theta_{h'} - \theta_{h'}^*\|_{\Sigma_{h'}^*}^2 \cdot \|(\Sigma_{h'}^*)^{-\frac{1}{2}} \Sigma_{h'}^{\tilde{\pi}_h} (\Sigma_{h'}^*)^{-\frac{1}{2}}\|_2 \\ &\leq 3\beta B \cdot \left( \lambda_r \cdot \left( \frac{2}{\lambda_{\text{ridge}}} \right)^2 + \frac{\Delta_{\min}^2 \epsilon_0}{120HBd^2} \right) \\ &\leq 96B\epsilon^3 + \frac{\Delta_{\min} \epsilon_0}{5Hd^2}. \end{aligned}$$

By Lemma 5,  $\mathbb{E}_{s_{h'} \sim \mathcal{D}_{h'}^{\bar{\pi}_h}} \left[ \sup_{a \in \mathcal{A}} \|\phi(s_{h'}, a)\|_{(\Sigma_{h'}^{\bar{\pi}_h})^{-1}}^2 \right] \leq d^2$ . Consequently

$$\begin{aligned} \mathbb{E}_{s_{h'} \sim \mathcal{D}_{h'}^{\bar{\pi}_h}} \left[ \sup_{a \in \mathcal{A}} |\phi(s_{h'}, a)^\top (\theta_{h'} - \theta_{h'}^*)|^2 \right] &\leq \mathbb{E}_{s_{h'} \sim \mathcal{D}_{h'}^{\bar{\pi}_h}} \left[ \|\theta_{h'} - \theta_{h'}^*\|_{\Sigma_{h'}^{\bar{\pi}_h}}^2 \cdot \sup_{a \in \mathcal{A}} \|\phi(s_{h'}, a)\|_{(\Sigma_{h'}^{\bar{\pi}_h})^{-1}}^2 \right] \\ &\leq 96B\epsilon^3 d^2 + \frac{\Delta_{\min} \epsilon_0}{5H} \leq \frac{\Delta_{\min} \epsilon_0}{4H}. \end{aligned}$$

In the last inequality we used  $\epsilon_0 = \epsilon^2$  and  $\epsilon \leq \text{poly}(\Delta_{\min}, 1/d, 1/H)$ . This proves (7). Finally the failure probability is controlled in Lemma 8.  $\square$

**Lemma 6** (Covariance concentration [Tropp, 2015]). *Suppose  $M_1, \dots, M_N \in \mathbb{R}^{d \times d}$  are i.i.d. random matrices drawn from a distribution  $\mathcal{D}$  over positive semi-definite matrices. If  $\|M_t\|_F \leq 1$  almost surely and  $N = \Omega\left(\frac{d \log(d/\delta)}{\epsilon^2}\right)$ , then with probability  $1 - \delta$ ,*

$$\left\| \frac{1}{N} \sum_{i=1}^N M_t - \mathbb{E}_{M \sim \mathcal{D}}[M] \right\|_2 \leq \epsilon.$$

**Lemma 7** (Risk bound for ridge regression, Lemma A.2 Du et al. [2019]). *Suppose that  $(x_1, y_1), \dots, (x_N, y_N)$  are i.i.d. data drawn from  $\mathcal{D}$  with*

$$y_i = \theta^\top x_i + b_i + \xi_i,$$

where  $\mathbb{E}_{(x_i, y_i) \sim \mathcal{D}}[b_i^2] \leq \eta$ ,  $|\xi_i| \leq 2n$  almost surely and  $\mathbb{E}[\xi_i] = 0$ . Let the ridge regression estimator be

$$\hat{\theta} = \left( \sum_{i=1}^N x_i x_i^\top + N \lambda_{\text{ridge}} \cdot I \right)^{-1} \cdot \sum_{i=1}^N x_i y_i.$$

If  $N = \Omega\left(\frac{d}{\epsilon_N^2} \log\left(\frac{d}{\delta}\right)\right)$ , then with probability at least  $1 - \delta$ ,

$$\mathbb{E}_{x \sim \mathcal{D}} \left[ \left( (\hat{\theta} - \theta)^\top x \right)^2 \right] \leq 4(\eta + \epsilon_N + \lambda_{\text{ridge}}).$$

**Lemma 8** (Failure probability). *Define the following events regarding the execution of Algorithm 1.*

1.  $\Omega_1$ : Each time  $\Sigma_h$  is updated,

$$\left\| \Sigma_h - \mathbb{E}_{\pi \sim \text{Unif}(\Pi_h), s_h \sim \mathcal{D}_h^\pi, a_h \sim \rho_{s_h}} \left[ \phi(s_h, a_h) \phi(s_h, a_h)^\top \right] \right\|_2 \leq \epsilon_2. \quad (10)$$

2.  $\Omega_2$ : Each time  $\theta_h$  is updated,

$$\mathbb{E}_{\pi \sim \text{Unif}(\Pi_h), s \sim \mathcal{D}_h^\pi, a \sim \rho_s} \left[ \left( (\theta_h - \theta_h^*)^\top \phi(s, a) \right)^2 \right] \leq 4(\eta + \epsilon_1 + \lambda_{\text{ridge}}), \quad (11)$$

where  $\eta$  is defined as in Lemma 7.

3.  $\Omega_3$ : Each time  $\theta_h$  is updated,

$$\mathbb{E}_{\pi \sim \text{Unif}(\Pi_h), s \sim \mathcal{D}_h^\pi, a \sim \rho_s} \left[ \left( (\theta_h - \theta_h^*)^\top \phi(s, a) \right)^2 \right] \leq 288\eta^{1.5} C^{2.5} d^{4.5} \left( \frac{2B}{\epsilon} \right)^{0.5}, \quad (12)$$

where  $\eta$  and  $C$  are defined as in Lemma 14.

Then under Assumption 3,  $\Pr[\Omega_1 \cap \Omega_2] \geq 1 - \epsilon$ . Alternatively, under Assumption 4,  $\Pr[\Omega_1 \cap \Omega_3] \geq 1 - \epsilon$ .

*Proof.* Note that  $N \geq \frac{d \log(1/\epsilon_2)}{\epsilon_2^2}$  where  $\epsilon_2 \leq \frac{\epsilon^6}{d}$ . Therefore, by Lemma 6, each time  $\Sigma_h$  is updated, (10) holds with probability at least  $1 - \epsilon^2$ .

As for (11), note that  $N \geq \frac{d \log(1/\epsilon_2)}{\epsilon_2^2} \gg \frac{d}{\epsilon_1^2} \cdot \log\left(\frac{d}{\epsilon^2}\right)$ . Thus by Lemma 7, each time  $\theta_h$  is updated, (11) holds with probability at least  $1 - \epsilon^2$ .

Similarly, for (12), under the choice of parameters under Assumption 4,  $N \geq \frac{d}{\epsilon^2} \gg \left(\frac{d}{\epsilon^2} + \frac{1}{\eta}\right) \ln \frac{2dB}{\epsilon} + \frac{2B}{\epsilon}$ . Thus by Lemma 14, the probability that (12) is violated each step is at most  $\epsilon/2B$ .

Note that when the algorithm terminates, the  $\Sigma_h$  and  $\theta_h$  are updated at most  $|\Pi_h|$  times. Also note that, if during the first  $B$  updates, neither (10) nor (11) are violated, by Lemma 10 it follows that  $|\Pi_h| \leq B$  when the algorithm terminates. In other words,

$$\Pr[\Omega_1 \cup \Omega_2] \geq 1 - B \cdot 2\epsilon^2 \geq 1 - \epsilon.$$

Similarly, under Assumption 4,

$$\Pr[\Omega_1 \cup \Omega_3] \geq 1 - B \cdot \epsilon^2 - B \cdot \frac{\epsilon}{2B} \geq 1 - \epsilon.$$

□

**Lemma 9** (Distribution shift error checking). *Assume that  $\epsilon_2 < \min\{\frac{1}{2}\beta\lambda_r, \frac{\lambda_r}{2B}\}$ . Consider the  $i$ f clause when checking for  $\pi_h \in \Pi_h$ , i.e. when computing  $\|\Sigma_{h'}^{-\frac{1}{2}} \hat{\Sigma}_{h'} \Sigma_{h'}^{-\frac{1}{2}}\|_2$ . Define*

$$M_1 := \frac{\lambda_r}{|\Pi_{h'}|} I + \mathbb{E}_{\pi \sim \text{Unif}(\Pi_{h'}), s_{h'} \sim \mathcal{D}_{h'}^\pi, a_{h'} \sim \rho_{s_{h'}}} [\phi(s_{h'}, a_{h'}) \phi(s_{h'}, a_{h'})^\top],$$

and

$$M_2 := \mathbb{E}_{s_{h'} \sim \mathcal{D}_{h'}^{\pi_h}, a_{h'} \sim \rho_{s_{h'}}} [\phi(s_{h'}, a_{h'}) \phi(s_{h'}, a_{h'})^\top].$$

Then under the event  $\Omega$  defined in Lemma 8, when  $\|\Sigma_{h'}^{-\frac{1}{2}} \hat{\Sigma}_{h'} \Sigma_{h'}^{-\frac{1}{2}}\|_2 \leq \beta |\Pi_{h'}|$ ,

$$\|M_1^{-1/2} M_2 M_1^{-1/2}\|_2 \leq 3\beta |\Pi_{h'}|.$$

When  $\|\Sigma_{h'}^{-\frac{1}{2}} \hat{\Sigma}_{h'} \Sigma_{h'}^{-\frac{1}{2}}\|_2 \geq \beta |\Pi_{h'}|$ ,

$$\|M_1^{-1/2} M_2 M_1^{-1/2}\|_2 \geq \frac{1}{4} \beta |\Pi_{h'}|.$$

*Proof.* By Lemma 6,

$$\|M_1 - \Sigma_{h'}\|_2 \leq \epsilon_2 \leq \frac{\lambda_r}{2B} \leq \frac{1}{2} \lambda_{\min}(\Sigma_{h'}).$$

Thus  $\frac{1}{2} \Sigma_{h'} \preceq M_1 \preceq 2 \Sigma_{h'}$ . Also by Lemma 6,  $\|M_2 - \hat{\Sigma}_{h'}\|_2 \leq \epsilon_2$ . Therefore, if  $\|\Sigma_{h'}^{-\frac{1}{2}} \hat{\Sigma}_{h'} \Sigma_{h'}^{-\frac{1}{2}}\|_2 \geq \beta |\Pi_{h'}|$ ,

$$\begin{aligned} \|M_1^{-1/2} M_2 M_1^{-1/2}\|_2 &\geq \frac{1}{2} \|\Sigma_{h'}^{-1/2} M_2 \Sigma_{h'}^{-1/2}\|_2 \geq \frac{1}{2} \|\Sigma_{h'}^{-1/2} \hat{\Sigma}_{h'} \Sigma_{h'}^{-1/2}\|_2 - \frac{1}{2} \epsilon_2 \|\Sigma_{h'}^{-1}\|_2 \\ &\geq \frac{1}{2} \beta |\Pi_{h'}| - \frac{1}{2} \epsilon_2 \cdot \frac{|\Pi_{h'}|}{\lambda_r} \geq \frac{1}{4} \beta |\Pi_{h'}|. \end{aligned}$$

Similarly, when  $\|\Sigma_{h'}^{-\frac{1}{2}} \hat{\Sigma}_{h'} \Sigma_{h'}^{-\frac{1}{2}}\|_2 \leq \beta |\Pi_{h'}|$ ,

$$\begin{aligned} \|M_1^{-1/2} M_2 M_1^{-1/2}\|_2 &\leq 2 \|\Sigma_{h'}^{-1/2} M_2 \Sigma_{h'}^{-1/2}\|_2 \leq 2 \|\Sigma_{h'}^{-1/2} \hat{\Sigma}_{h'} \Sigma_{h'}^{-1/2}\|_2 + 2\epsilon_2 \|\Sigma_{h'}^{-1}\|_2 \\ &\leq 2\beta |\Pi_{h'}| + 2\epsilon_2 \cdot \frac{|\Pi_{h'}|}{\lambda_r} \leq 3\beta |\Pi_{h'}|. \end{aligned}$$

□

**Lemma 10** (Lemma A.6 in Du et al. [2019]). *Under the event  $\Omega_1$  defined in Lemma 8,  $|\Pi_h| \leq B$  for all  $h \in [H]$ .*

*Proof.* We provide a proof for completeness. Fix a level  $h' \in [H]$ . Define

$$A := \lambda_r I + \sum_{\pi \in \Pi_{h'}} \mathbb{E}_{s_{h'} \sim \mathcal{D}_{h'}^\pi, a_{h'} \sim \rho_{s_{h'}}} [\phi(s_{h'}, a_{h'}) \phi(s_{h'}, a_{h'})^\top].$$

By the update rule at Line 6,  $|\Pi_{h'}|$  is expanded if and only if the if clause at Line 5 returns False when checking for some  $\tilde{\pi}_h$ . By Lemma 9, define

$$M := \mathbb{E}_{s_{h'} \sim \mathcal{D}_{h'}^{\tilde{\pi}_h}, a_{h'} \sim \rho_{s_{h'}}} [\phi(s_{h'}, a_{h'}) \phi(s_{h'}, a_{h'})^\top],$$

then

$$\|A^{-1/2} M A^{-1/2}\|_2 \geq \frac{1}{4} \beta = 2.$$

Note that after  $\Pi_{h'}$  is updated to  $\Pi_{h'} \cup \{\tilde{\pi}_h\}$ ,  $A$  would be updated to  $A + M$ . Observe that

$$\det(A + M) = \det(A) \cdot \det(I + A^{-1/2} M A^{-1/2}) \geq 3 \det(A).$$

Therefore during the execution of the algorithm,

$$\det(A) \geq 3^{|\Pi_{h'}|} \cdot \lambda_r^d.$$

On the other hand, since  $\|\phi(s, a) \phi(s, a)^\top\|_2 \leq 1$ ,

$$\det(A) \leq (\lambda_r + |\Pi_{h'}|)^d.$$

The lemma follows by solving  $3^{|\Pi_{h'}|} \cdot \lambda_r^d \leq (\lambda_r + |\Pi_{h'}|)^d$ .  $\square$

## 6 Analysis of Ridge Regression under Hypercontractivity

Recall that a distribution  $\mathcal{D}$  is  $(C, 4)$ -hypercontractive if  $\forall v$ ,

$$\mathbb{E}_{x \sim \mathcal{D}}[(x^\top v)^4] \leq C \cdot (\mathbb{E}_{x \sim \mathcal{D}}[(x^\top v)^2])^2.$$

In this section we prove an strengthened version of Lemma 7 for hypercontractive distributions (Lemma 14), which may be of independent interest.

**Lemma 11.** *Let  $x$  be a  $d$ -dimensional r.v. If the distribution of  $x$  is  $(C, 4)$ -hypercontractive and isotropic (i.e.  $\mathbb{E}[xx^\top] = I$ ), then*

$$\Pr[\|x\|_2 > t] \leq \frac{C d^2}{t^4}.$$

*Proof.* Consider a Gaussian random vector  $v \sim N(0, I)$ . Then

$$\mathbb{E}_v[(x^\top v)^4] = \|x\|^4 \cdot \mathbb{E}_{\xi \sim N(0,1)} \xi^4 = 3\|x\|^4.$$

Therefore

$$\begin{aligned} \mathbb{E}_x[\|x\|^4] &= \frac{1}{3} \mathbb{E}_{x,v}[(x^\top v)^4] \leq \frac{C}{3} \mathbb{E}_v(\mathbb{E}_x(x^\top v)^2)^2 \\ &\leq \frac{C}{3} \mathbb{E}_v\|v\|^4 = \frac{C \cdot (d^2 + 2d)}{3} \leq d^2 C. \end{aligned}$$

The claim then follows from Markov's inequality.  $\square$

**Lemma 12.** *If the  $x_1, \dots, x_n$  are i.i.d. samples from a  $(C, 4)$ -hypercontractive distribution. Let  $\sigma(\cdot)$  denote the decreasing order of  $\|x_i\|_2$ . Then with probability  $1 - \delta$ ,*

$$\sum_{k=1}^m \|x_{\sigma(k)}\|_2 = 3\delta^{-1/4} n^{1/4} m^{3/4} C^{1/4} d^{1/2}.$$

*Proof.* Fix  $k \in [m]$ . Set  $t = \alpha \left(\frac{C d^2 n}{k}\right)^{1/4}$ . By Lemma 11,

$$\begin{aligned} \Pr[\|x_{\sigma(k)}\|_2 > t] &\leq \binom{n}{k} \Pr[\|x\|_2 > t]^k \leq \binom{n}{k} \cdot \left(\frac{C d^2}{t^4}\right)^k \\ &\leq \frac{n^k}{k!} \cdot \frac{k^k}{\alpha^{4k} n^k} \leq \left(\frac{e}{\alpha^4}\right)^k. \end{aligned}$$

Choosing  $\alpha = \left(\frac{2e}{\delta}\right)^{1/4}$  gives  $\Pr[\|x_{\sigma(k)}\|_2 > t] \leq (\delta/2)^k$ . By a union bound, with probability  $1 - \delta$ ,

$$\sum_{i=1}^m \|x_{\sigma(i)}\|_2 \leq \sum_{k=1}^m (2e/\delta)^{1/4} \left(\frac{Cd^2n}{k}\right)^{1/4} \leq 3\delta^{-1/4} n^{1/4} m^{3/4} C^{1/4} d^{1/2}.$$

□

**Lemma 13** (Lemma 3.4 Bakshi and Prasad [2020]). *If  $\mathcal{D}$  is  $(C, 4)$ -hypercontractive and  $x_1, \dots, x_n$  are i.i.d. samples drawn from  $\mathcal{D}$ . Let  $\Sigma := \mathbb{E}_{x \sim \mathcal{D}}[xx^\top]$ . With probability  $1 - \delta$ ,*

$$\left(1 - \frac{Cd^2}{\sqrt{n\delta}}\right) \Sigma \preceq \frac{1}{n} \sum_{i=1}^n x_i x_i^\top \preceq \left(1 + \frac{Cd^2}{\sqrt{n\delta}}\right) \Sigma.$$

**Lemma 14** (Risk bound for ridge regression with hypercontractivity). *Suppose that  $(x_1, y_1), \dots, (x_N, y_N)$  are i.i.d. data drawn from  $\mathcal{D}$  with*

$$y_i = \theta^\top x_i + b_i + \xi_i,$$

where  $\Pr[b_i \neq 0] \leq \eta$ ,  $\|b\|_\infty \leq 1$ ,  $|\xi_i| \leq 1$ , and  $\mathbb{E}[\xi_i] = 0$ . Assume that distribution of  $x$  is  $(C, 4)$ -hypercontractive (see Assumption 4). Let the ridge regression estimator be

$$\hat{\theta} = \left( \sum_{i=1}^N x_i x_i^\top + N\lambda_{\text{ridge}} \cdot I \right)^{-1} \cdot \sum_{i=1}^N x_i y_i.$$

If  $N = \Omega\left(\left(\frac{d}{\epsilon_N^2} + \frac{1}{\eta}\right) \log\left(\frac{d}{\delta}\right) + \frac{1}{\delta}\right)$ , then with probability at least  $1 - \delta$ ,

$$\mathbb{E}_{x \sim \mathcal{D}} \left[ \left( (\hat{\theta} - \theta)^\top x \right)^2 \right] \leq 8(\epsilon_N + \lambda_{\text{ridge}}) + 288\eta^{1.5} C^{2.5} d^{4.5} \delta^{-0.5}.$$

*Proof.* Define  $\hat{\Sigma} := \frac{1}{N} \sum_{i=1}^N x_i x_i^\top$  and  $\Sigma := \mathbb{E}_{x \sim \mathcal{D}}[xx^\top]$ . Then

$$\begin{aligned} \hat{\theta} &= \frac{1}{N} \left( \lambda_{\text{ridge}} I + \hat{\Sigma} \right)^{-1} \sum_{i=1}^N (x_i x_i^\top \theta + x_i \cdot \xi_i + x_i \cdot b_i) \\ &= \underbrace{\frac{1}{N} \left( \lambda_{\text{ridge}} I + \hat{\Sigma} \right)^{-1} \sum_{i=1}^N b_i x_i}_{(a)} + \underbrace{\frac{1}{N} \left( \lambda_{\text{ridge}} I + \hat{\Sigma} \right)^{-1} \sum_{i=1}^N (x_i x_i^\top \theta + x_i \cdot \xi_i)}_{(b)}. \end{aligned}$$

By Lemma 7,  $\|\theta - (b)\|_\Sigma^2 \leq 4(\epsilon_N + \lambda_{\text{ridge}})$ . It remains to bound the  $\|\cdot\|_\Sigma$  norm of (a).

First, by Hoeffding's inequality, with probability  $1 - \delta$ ,  $\|b\|_0 = \sum_{i=1}^n I[b_i \neq 0] \leq 2\eta N$ . Define  $z_i := \Sigma^{-1/2} x_i$  to be the normalized input. It can be seen that  $\mathbb{E}[z_i z_i^\top] = I$  and that the distribution of  $z_i$  is also hypercontractive. By Lemma 12, with probability  $1 - 2\delta$ ,

$$\sum_{i=1}^n \|z_i\|_2 \cdot I[b_i \neq 0] \leq 3\delta^{-1/4} N^{1/4} (2\eta N)^{3/4} (Cd^2)^{1/4}.$$

It follows that with probability  $1 - 2\delta$ ,

$$\begin{aligned} \|(a)\|_\Sigma &= \frac{1}{N} \left\| \hat{\Sigma}^{-1} \sum_{i=1}^N x_i b_i \right\|_\Sigma \leq \frac{1}{N} \sum_{i=1}^N \|\Sigma^{1/2} \hat{\Sigma}^{-1} x_i b_i\|_2 \\ &= \frac{1}{N} \sum_{i=1}^N \|\Sigma^{1/2} \hat{\Sigma}^{-1} \Sigma^{1/2} z_i b_i\|_2 \\ &\leq \frac{1}{N} \|\Sigma^{1/2} \hat{\Sigma}^{-1} \Sigma^{1/2}\|_2 \cdot \sum_{i=1}^N \|z_i\|_2 \cdot H \cdot I[b_i \neq 0] \\ &\leq 3H \left(1 + \frac{Cd^2}{\sqrt{N\delta}}\right) \cdot \delta^{-1/4} N^{-3/4} (2\eta N)^{3/4} (Cd^2)^{1/4} \\ &\leq 12H\eta^{0.75} \cdot C^{\frac{5}{4}} d^{\frac{9}{4}} \delta^{-\frac{1}{4}}. \end{aligned}$$

Therefore

$$\begin{aligned}\|\hat{\theta} - \theta\|_{\Sigma}^2 &\leq 2\|\hat{\theta} - (b)\|_{\Sigma}^2 + 2\|(a)\|_{\Sigma}^2 \\ &\leq 8(\epsilon_N + \lambda_{\text{ridge}}) + 288\eta^{1.5}C^{2.5}d^{4.5}\delta^{-0.5}.\end{aligned}$$

□

## References

- Ainesh Bakshi and Adarsh Prasad. Robust linear regression: Optimal rates in polynomial time. *arXiv preprint arXiv:2007.01394*, 2020.
- Simon S Du, Yuping Luo, Ruosong Wang, and Hanrui Zhang. Provably efficient q-learning with function approximation via distribution shift error checking oracle. In *Advances in Neural Information Processing Systems*, pages 8060–8070, 2019.
- Joel A Tropp. An introduction to matrix concentration inequalities. *Foundations and Trends in Machine Learning*, 8(1-2):1–230, 2015.
